# Supplementary material
Source: Springer Nature journal article supplement (https://www.springermedizin.de/resource/supplementary/12984_2012_418_MOESM6_ESM.pdf/9604532)

Order A

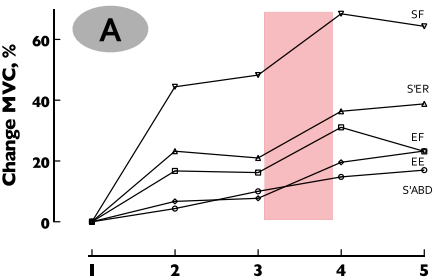

Order B

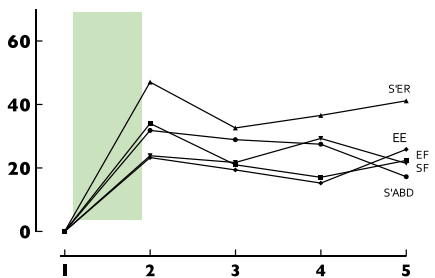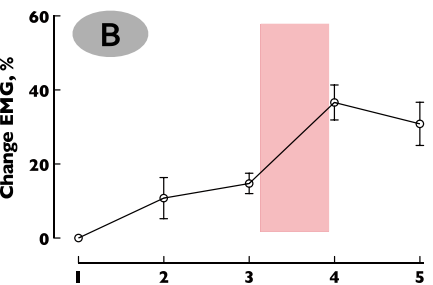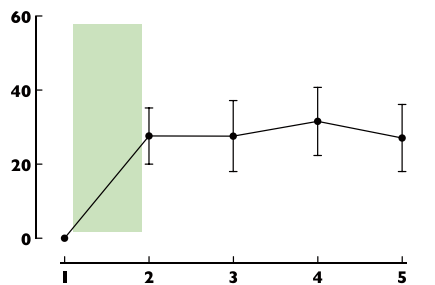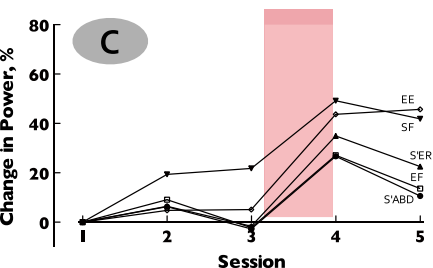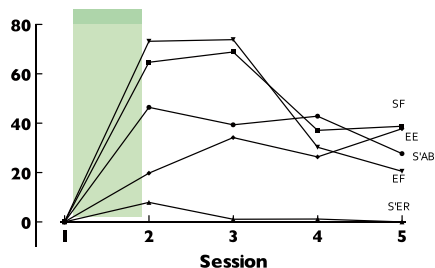

Supplement: MOESM6 [file 9604532]
